# Supplementary material
Source: PubMed Central journal article supplement (PMC5925724)
Supplement: JCM.01908-17_zjm999095939s1.pdf [file JCM.01908-17_zjm999095939s1.pdf]

**Supplemental Table:** Oligonucleotides sequences of probes

| Organism                         | Probe name | Probe sequence (5'-3')          | Length (pb) |
|----------------------------------|------------|---------------------------------|-------------|
| Common for all<br>fungi          | 50-17      | GATGAAGAACGCAGCGATTTTTTTTTT     | 27          |
|                                  | 50-19      | CGATGAAGAACGCAGCGAATTTTTTTTTT   | 29          |
|                                  | 51-17      | GAGTCTTTGAACGCACATTTTTTTTTT     | 27          |
|                                  | 51-19      | CGAGTCTTTGAACGCACATTTTTTTTTT    | 29          |
|                                  | 52-17R     | TTTTTTTTTTACCAAGAGATCCGTTGT     | 27          |
|                                  | 52-19R     | TTTTTTTTTTAACCAAGAGATCCGTTGT    | 29          |
| <i>Aspergillus<br/>fumigatus</i> | 33B-1R     | TTTTTTTTTTTAACTGATTACGATAATCAA  | 30          |
|                                  | 33B-2R     | TTTTTTTTTTTAACTGATTACGATAATCA   | 29          |
|                                  | 33B-4R     | TAACTGATTACGATAATCAATTTTTTTTTT  | 30          |
|                                  | 33C 1R     | TTTTTTTTTTTAACTGATTACGATAATCAAC | 31          |
|                                  | 33C 2R     | TTTTTTTTTTTACTGATTACGATAATCAAC  | 29          |
|                                  | 33C 3R     | TTTTTTTTTTTCTGATTACGATAATCAAC   | 28          |
|                                  | 34A-8      | TTGTCACCTGCTCTGTTTTTTTTTTT      | 26          |
|                                  | 34A-14     | TTGTCACCTGCTCTTTTTTTTTTTT       | 24          |
|                                  | 34A-17     | GTCACCTGCTCTGTTTTTTTTTTT        | 23          |
|                                  | 34A-20     | TTTTTTTTTTTTTTGTCACCTGCTC       | 24          |
| <i>Aspergillus flavus</i>        | 60B 1      | TTTTTTTTTTTGATCTAGTGAAGTCTGAG   | 29          |
|                                  | 60B 1R     | TTTTTTTTTTTCTCAGACTTCACTAGATCA  | 29          |
|                                  | 60B 17R    | TCAGACTTCACTAGATCTTTTTTTTTT     | 27          |
|                                  | 60C 1R     | TTTTTTTTTTTAACTGATTGCGATAACAAT  | 29          |
|                                  | 60C 2R     | TTTTTTTTTTTACTGATTGCGATAACAAT   | 27          |
|                                  | 60C-19R    | TAACTGATTGCGATAACAATTTTTTTTTT   | 29          |

|                               |         |                               |    |
|-------------------------------|---------|-------------------------------|----|
| <i>Aspergillus nidulans</i>   | 64B 8   | TTTTTTTTTTAGTTCAGTGGTCCCCGGC  | 28 |
|                               | 64B 9   | TTTTTTTTTTAGTTCAGTGGTCCCCG    | 26 |
|                               | 65A 15  | GGCGTCTCCAACCTTTTTTTTTTTT     | 25 |
|                               | 65A 17  | CGGCGTCTCCAACCTTATTTTTTTTTT   | 27 |
|                               | 65A 19  | CCGGCGTCTCCAACCTTATTTTTTTTTT  | 29 |
| <i>Aspergillus niger</i>      | 62A 4   | TTTTTTTTTTATAGACACGGATG       | 23 |
|                               | 63A 15  | TTTTTTTTTTCCAACCATTCTTTCCA    | 26 |
|                               | 63A 17  | TTTTTTTTTTCCAACCATTCTTTCCA    | 27 |
|                               | 63A 19  | TTTTTTTTTTCCAACCATTCTTTCCAG   | 29 |
| <i>Aspergillus terreus</i>    | 35A 17R | GCAAAGAATCACACTCATTTTTTTTTT   | 27 |
|                               | 35A 19  | TGAGTGTGATTCTTTGCAATTTTTTTTT  | 29 |
|                               | 35A 19R | TTGCAAAGAATCACACTCATTTTTTTTTT | 29 |
|                               | 36A 1   | TTTTTTTTTTGGCTTCGTCTCCGCTCCG  | 29 |
|                               | 36A 2   | TTTTTTTTTTGCTTCGTCTCCGCTCC    | 27 |
|                               | 36A 19  | GGCTTCGTCTCCGCTCCGTTTTTTTTT   | 29 |
|                               | 36B 15  | CGACGCATTTATTTGTTTTTTTTTT     | 25 |
|                               | 36B 17  | GCCGACGCATTTATTTGTTTTTTTTTT   | 27 |
|                               | 36B 19  | CGCCGACGCATTTATTTGCTTTTTTTTT  | 29 |
| <i>Blastomyces dermatidis</i> | 41A 17R | GTTCTCCGGTCTAGGATTTTTTTTTT    | 27 |
|                               | 41A 19R | GGTCTCCGGTCTAGGAGTTTTTTTTTT   | 29 |
|                               | 42A 15  | CCGGCCCCATCTCAATTTTTTTTTT     | 25 |
|                               | 42A 17  | TCCGGCCCCATCTCAAATTTTTTTTTT   | 27 |
| <i>Candida albicans</i>       | 14A 15  | CGGAGATGCTTGACTTTTTTTTTTT     | 25 |
|                               | 14A 17  | CGGAGATGCTTGACAATTTTTTTTTTT   | 27 |

|                             |        |                                |    |
|-----------------------------|--------|--------------------------------|----|
|                             | 1A 17R | TTTTTTTTTTAAGTTTAGACCTCTGGC    | 27 |
|                             | 1A 19  | CCGCCAGAGGTCTAAACTTTTTTTTTTTT  | 29 |
|                             | 1B 15R | TTTTTTTTTTATCTGGTGTGACAAG      | 25 |
|                             | 1B 17R | TTTTTTTTTTTAATCTGGTGTGACAAG    | 27 |
|                             | 1B 19  | ACTTGTCACACCAGATTATTTTTTTTTTT  | 29 |
|                             | 2A 15  | CGTCCACCACGTATATTTTTTTTTTT     | 25 |
|                             | 2A 17  | AACGTCCACCACGTATATTTTTTTTTTT   | 27 |
|                             | 2A 19  | GTAACGTCCACCACGTATATTTTTTTTTTT | 29 |
|                             | 2B 15  | TTTTTTTTTTATTGCTTGCGGCGGT      | 25 |
|                             | 2B 17  | TTTTTTTTTTTACATTGCTTGCGGCGGT   | 27 |
| <i>Candida dubliniensis</i> | 13A-2R | TTTTTTTTTTAACAAAACAC           | 27 |
|                             | 13A-3R | TTTTTTTTTTAACAAAACACATGTGG     | 26 |
|                             | 13B 15 | TTTTTTTTTTTATAAACTTGTCACG      | 25 |
|                             | 13B 17 | TTTTTTTTTTTATAAACTTGTCACGAG    | 27 |
| <i>Candida famata</i>       | 80B-1  | TGGTCTGGACTAGAAATATTTTTTTTT    | 28 |
|                             | 80B-1R | TTTTTTTTTTATTTCTAGTCCAGACCA    | 28 |
|                             | 81A-1  | TTTTTTTTTTTAGTGCTATATGACTTTC   | 28 |
|                             | 81A-3  | TTTTTTTTTTTAGTGCTATATGACTTTC   | 27 |
| <i>Candida glabrata</i>     | 7A 15R | TTTTTTTTTTTGTCTCTCTCCGAGC      | 25 |
|                             | 7A 17R | TTTTTTTTTTTATGTCTCTCTCCGAGCT   | 27 |
|                             | 7A 19R | TTTTTTTTTTTGATGTCTCTCTCCGAGCTC | 29 |
|                             | 7B 17  | CTCCTGCCTGCGCTTAATTTTTTTTTTT   | 27 |
|                             | 7B 19  | TTCTCCTGCCTGCGCTTAATTTTTTTTTTT | 29 |
|                             | 7B 19R | TTAAGCGCAGGCAGGAGAATTTTTTTTTTT | 29 |

|                               |          |                                |    |
|-------------------------------|----------|--------------------------------|----|
|                               | 8A 17    | TTTTTTTTTTAACTTGAAATTGTAGGC    | 27 |
|                               | 8A 19    | TTTTTTTTTTAACTTGAAATTGTAGGCCA  | 29 |
|                               | 8B 15    | TTTTTTTTTTTGCTGCTCGTTTGCG      | 25 |
|                               | 8B 17    | TTTTTTTTTTTGCTGCTCGTTTGCGC     | 27 |
|                               | 8B 19    | TTTTTTTTTTTCTGCTGCTCGTTTGCGCG  | 29 |
| <i>Candida guilliermondii</i> | 55A 17R  | TTTTTTTTTTAAAATTTGACTAACTGT    | 27 |
|                               | 55A 19   | TTTACAGTTAGTCAAATTTTTTTTTTTT   | 29 |
|                               | 55A 19R  | TTTTTTTTTTCAAATTTGACTAACTGTA   | 29 |
|                               | 55B 15   | GTCGACCTCTCAATGTTTTTTTTTT      | 25 |
|                               | 55B 17   | TGTCGACCTCTCAATGTTTTTTTTTT     | 27 |
|                               | 55B 19   | CTGTCGACCTCTCAATGTATTTTTTTTTT  | 29 |
| <i>Candida kefyr</i>          | Ck1-t16R | TTTTTTTTTTGTCAGACGATCCCCC      | 26 |
|                               | Ck2-20Rt | TAGCAGAGAATCAAGAAGTGTTTTTTTTTT | 30 |
|                               | Ck2-t20R | TTTTTTTTTTTAGCAGAGAATCAAGAAGT  | 30 |
|                               | Ck4-t17  | TTTTTTTTTTTCGTCTCGGGTAACTTG    | 27 |
|                               | Ck4-17Rt | CAAGTTAACCCGAGACGTTTTTTTTTT    | 27 |
|                               | Ck4-t17R | TTTTTTTTTTCAAGTTAACCCGAGACG    | 27 |
|                               | Ck6-18Rt | GCAAGAGTCGAGTCCATATTTTTTTTTT   | 28 |
| <i>Candida krusei</i>         | 9B 17R   | GCTATATCCACATTTTTTTTTTTTTT     | 27 |
|                               | 9B 19R   | ATGCTATATCCACATTTTTTTTTTTTTT   | 29 |
|                               | 9C-1R    | TTTTTTTTTTTCGACTATATGCTATATTC  | 29 |
|                               | 9C-2R    | CGACTATATGCTATATTCCTTTTTTTTTT  | 29 |
|                               | 9C-3R    | TTTTTTTTTTTCGACTATATGCTATATTC  | 29 |
|                               | 10A 15   | GCGGACGACGTGTAATTTTTTTTTT      | 25 |

|                             |         |                                |    |
|-----------------------------|---------|--------------------------------|----|
|                             | 10A 17  | GCGGACGACGTGTAAAGTTTTTTTTTT    | 27 |
|                             | 10A 19  | GAGCGGACGACGTGTAAAGTTTTTTTTTT  | 29 |
|                             | 10B 15  | TTTTTTTTTTGAGCGAAGCTGGCCG      | 25 |
|                             | 10B 17  | TTTTTTTTTTAGCGAAGCTGGCCGAGC    | 27 |
|                             | 10B 19  | TTTTTTTTTTGAGCGAAGCTGGCCGAGCG  | 29 |
| <i>Candida lusitaniae</i>   | 11C 14R | TGTTGCAAAAACATTTTTTTTTTT       | 24 |
|                             | 11C 15R | TGTTGCAAAAACAATTTTTTTTTTT      | 25 |
|                             | 11C 16R | TGTTGCAAAAACAATTTTTTTTTTT      | 26 |
|                             | 11B 19  | TTCGAATTTCTTAATATCATTTTTTTTTTT | 29 |
|                             | 11B 19R | TTGATATTAAGAAATTCGATTTTTTTTTTT | 29 |
|                             | 12A 17R | TTTCGGAGCAACGCCTATTTTTTTTTTT   | 27 |
|                             | 12A 19  | TTAGGCGTTGCTCCGAAATTTTTTTTTTT  | 29 |
|                             | 12A 19R | TTTCGGAGCAACGCCTAACTTTTTTTTTTT | 29 |
|                             | 12B 17  | CGTTTACAGCACGACATTTTTTTTTTT    | 27 |
|                             | 12B 19  | CACGTTTACAGCACGACATTTTTTTTTTT  | 29 |
| <i>Candida parapsilosis</i> | 5A 17   | CTGCCAGAGATTAAACTTTTTTTTTTT    | 27 |
|                             | 5A 18   | CTGCCAGAGATTAAACTCTTTTTTTTTTT  | 28 |
|                             | 5A 18R  | GAGTTTAATCTCTGGCAGTTTTTTTTTT   | 28 |
|                             | 6A 17   | TTTTTTTTTTTCCAAAACCTCTTCCATT   | 27 |
|                             | 6A 19   | TTTTTTTTTTTCTCCAAAACCTCTTCCATT | 29 |
|                             | 6A 19R  | TTTTTTTTTTAATGGAAGAAGTTTGGAG   | 29 |
|                             | 6B 17   | TTTTTTTTTTTACTCCAAAACCTCTTCC   | 27 |
|                             | 6B 18   | TTTTTTTTTTTACTCCAAAACCTCTTCCA  | 28 |
|                             | 6B 18R  | TTTTTTTTTTTGGAAGAAGTTTGGAGT    | 28 |

|                                         |         |                               |    |
|-----------------------------------------|---------|-------------------------------|----|
| <i>Candida tropicalis</i>               | 3A 16R  | TTTTTTTTTTGGATTGCTCCCGCCAC    | 26 |
|                                         | 3A 17R  | TTTTTTTTTTGGATTGCTCCCGCCACC   | 27 |
|                                         | 3B 15R  | TTTTTTTTTTATCAAGTTTGACTGT     | 25 |
|                                         | 3B 17R  | TTTTTTTTTTAAATCAAGTTTGACTGT   | 27 |
|                                         | 3B 19R  | TTTTTTTTTTAAATCAAGTTTGACTGTAA | 29 |
|                                         | 4A 15   | TTTTTTTTTTATACGCTAGGTTTGT     | 25 |
|                                         | 4A 17   | TTTTTTTTTTATACGCTAGGTTTGTTT   | 27 |
|                                         | 4A 19   | TTTTTTTTTTCAATACGCTAGGTTTGTTT | 29 |
|                                         | 4B 17   | GCTAGTGGCCACCACCTTTTTTTTTTTT  | 27 |
|                                         | 4B 19   | GCTAGTGGCCACCACAATTTTTTTTTTTT | 29 |
| <i>Coccidioides<br/>posadasii</i>       | 37C 15R | GGAGGTGCGCAGCCGTTTTTTTTTT     | 25 |
|                                         | 37C 17R | GGGAGGTGCGCAGCCGTTTTTTTTTT    | 27 |
|                                         | 37C 19R | GGGGAGGTGCGCAGCCGGATTTTTTTTTT | 29 |
|                                         | 37E 15R | TTTTTGCTATGATGCTTTTTTTTTTT    | 25 |
|                                         | 37E 17R | GATTTTGGCTATGATGCTTTTTTTTTTT  | 27 |
|                                         | 37E 18R | GATTTTGGCTATGATGCTTTTTTTTTTT  | 28 |
|                                         | 38D-1   | TTATATCCGGTTTGACCTCTTTTTTTTTT | 29 |
|                                         | 38D-2   | ATATCCGGTTTGACCTCTTTTTTTTTTT  | 27 |
|                                         | 38D-3   | TATCCGGTTTGACCTTTTTTTTTTTT    | 25 |
|                                         | 38E 15  | TTTTTTTTTTACCCGATCGGGGCCG     | 25 |
|                                         | 38E 17  | TTTTTTTTTTGACCCGATCGGGGCCGA   | 27 |
|                                         | 38E 19  | TTTTTTTTTTAGACCCGATCGGGGCCGAT | 29 |
| <i>Cryptococcus<br/>neoformans</i> var. | 22A-8   | GTTTATGTGCTTCGGCACTTTTTTTTTT  | 28 |
|                                         | 22A 17  | TTTTTTTTTTGTTTATGTGCTTCGGCA   | 27 |

|                                           |          |                                |    |
|-------------------------------------------|----------|--------------------------------|----|
| <i>neoformans, grubii, gattii</i>         | 23A 17   | TTTTTTTTTTGAAGGTGATTACCTGTC    | 27 |
|                                           | 23A 19   | TTTTTTTTTTGGAAGGTGATTACCTGTCA  | 29 |
|                                           | 23B 1    | TTTTTTTTTTTTTCGCTGGGCCTATGG    | 27 |
|                                           | 23B 2    | TTTTTTTTTTGTTCGCTGGGCCTATGGG   | 29 |
| <i>Fusarium</i> sp.                       | 7-16t    | GGCCACGCCGTTAAACTTTTTTTTTT     | 26 |
|                                           | 7-18t    | CTTCTGAATGTTGACCTCTTTTTTTTTT   | 28 |
|                                           | 7-19t    | CGCGGCCACGCCGTTAAACTTTTTTTTTT  | 29 |
|                                           | 7B-19t   | CAACTTCTGAATGTTGACCTTTTTTTTTT  | 29 |
|                                           | 7C-18t   | CAACTTCTGAATGTTGACCTTTTTTTTTT  | 28 |
|                                           | 7C-19t   | CCGTAAACCCCAACTTCTGTTTTTTTTT   | 29 |
|                                           | 10B-16Rt | GTATGTTACAGGGGTTTTTTTTTT       | 26 |
|                                           | 10B-18Rt | GTATGTTACAGGGGTTGTTTTTTTTT     | 28 |
| <i>Fusarium solani</i><br>species complex | 1-16Rt   | CCGTCTGTTCCCGCCGTTTTTTTTTT     | 26 |
|                                           | 1-18Rt   | GCCGTCTGTTCCCGCCGATTTTTTTTTT   | 28 |
|                                           | 1-19Rt   | CCGTCTGTTCCCGCCGAAGTTTTTTTTT   | 29 |
|                                           | 2-19Rt   | GCCGATCCCCAACGCCAGGTTTTTTTTT   | 29 |
|                                           | 4-18t    | CACCTCGCAACTGGAGAGTTTTTTTTT    | 28 |
|                                           | 4-19t    | GCTAACACCTCGCAACTGGATTTTTTTTTT | 29 |
|                                           | 4-20t    | GTAGCTAACACCTCGCAACTTTTTTTTTT  | 30 |
|                                           | 6B-17Rt  | CAGAGTTAGGGGTCCTCTTTTTTTTTT    | 27 |
|                                           | 9-17t    | ACGTTGCTTCGGCGGGATTTTTTTTTT    | 27 |
| <i>Histoplasma capsulatum</i>             | 39B-22   | TTTTTTTTTTTCGTTACCGACGGTTCTT   | 28 |
|                                           | 39B-24   | TTTTTTTTTTGTTACCGACGGTTCT      | 26 |
|                                           | 39B-25   | TTTTTTTTTTGTTACCGACGGTTC       | 25 |

|                                      |                  |                                |                          |
|--------------------------------------|------------------|--------------------------------|--------------------------|
|                                      | 39C 15R          | AGGTCCGGTAGACAATTTTTTTTTT      | 25                       |
|                                      | 39C 17R          | CAGGTCCGGTAGACAAGTTTTTTTTT     | 27                       |
|                                      | 39C 19R          | ACAGGTCCGGTAGACAAGTTTTTTTTT    | 29                       |
| <i>Malassezia furfur</i>             | 48A 15R          | TTTTTTTTTCCAAACGGTGCACAC       | 25                       |
|                                      | 48A 17R          | TTTTTTTTTCCAAACGGTGCACACG      | 27                       |
|                                      | 48A 19R          | GATTCCACGTTCATAACAATTTTTTTTT   | 29                       |
|                                      | 48B 15R          | TTCCACGTTCATACTTTTTTTTTT       | 25                       |
|                                      | 48B 17R          | ATTCCACGTTCATACATTTTTTTTTT     | 27                       |
|                                      | 48B 19R          | GATTCCACGTTCATAACAATTTTTTTTT   | 29                       |
|                                      | 49A 7            | TGCGATTGCACTGCTTTGTTTTTTTTT    | 28                       |
|                                      | 49A 8            | GCGATTGCACTGCTTTGTTTTTTTTT     | 27                       |
|                                      | 49A 9            | CGATTGCACTGCTTTGTTTTTTTTT      | 26                       |
|                                      | 49B 15           | TTTTTTTTTGCATTAGCGCCTTTG       | 25                       |
|                                      | 49B 17           | TTTTTTTTTGCATTAGCGCCTTTGG      | 27                       |
|                                      | 49B 19           | TTTTTTTTTATGCATTAGCGCCTTTGGG   | 29                       |
|                                      | <i>Mucor</i> sp. | M1-t15R                        | TTTTTTTTTTAATACAGTTCACAG |
| M1-16Rt                              |                  | AATAATACAGTTCACATTTTTTTTTT     | 26                       |
| M1-t16R                              |                  | TTTTTTTTTTAATAATACAGTTCACA     | 26                       |
| M3-20Rt                              |                  | GGTAAATAATAATAGGATACTTTTTTTTTT | 30                       |
| M3-t20R                              |                  | TTTTTTTTTTGGTAAATAATAATAGGATAC | 30                       |
| M4-t15R                              |                  | TTTTTTTTTTGGTCTATGTTACAAT      | 25                       |
| <i>Paracoccidioides brasiliensis</i> | 45A 15R          | CCCCGTCCCCCACGTTTTTTTTT        | 25                       |
|                                      | 45A 17R          | GCCCCGTCCCCCACGGTTTTTTTTT      | 27                       |
|                                      | 45A 18R          | GGCCCCGTCCCCCACGGTTTTTTTTT     | 28                       |



|                                        |          |                                 |    |
|----------------------------------------|----------|---------------------------------|----|
|                                        | 45B 15R  | TTTTTTTTTTTCAAAGCTCCGAACC       | 25 |
|                                        | 45B 17R  | TTTTTTTTTTGTCAAAGCTCCGAACCA     | 27 |
|                                        | 45B 19R  | TTTTTTTTTTTCGTCAAAGCTCCGAACCAG  | 29 |
|                                        | 46A 15   | CCCCACTCATCGACCTTTTTTTTTTT      | 25 |
|                                        | 46A 17   | GCCCCACTCATCGACCCTTTTTTTTTTT    | 27 |
|                                        | 46A 19   | GGCCCCACTCATCGACCCCTTTTTTTTTTT  | 29 |
| <i>Penicillium<br/>marneffeii</i>      | 43B 15R  | TTTTTTTTTTTCAGACAGTCCATCT       | 25 |
|                                        | 43B 17R  | TTTTTTTTTTTCTCAGACAGTCCATCTT    | 27 |
|                                        | 43B 19R  | TTTTTTTTTTTACTCAGACAGTCCATCTTC  | 29 |
|                                        | 44A 17   | TTTTTTTTTTTCCACCATATTTACCACG    | 27 |
|                                        | 44A 19   | TTTTTTTTTTTACCACCATATTTACCACGG  | 29 |
| <i>Rhizomucor</i> sp.                  | Rm1-17t  | AGGGATTGCTCCAGATCTTTTTTTTTTT    | 27 |
|                                        | Rm1-t17R | TTTTTTTTTTTGATCTGGAGCAATCCCT    | 27 |
|                                        | Rm2-17t  | CTTTGGATTGCGGTGCTTTTTTTTTTT     | 27 |
|                                        | Rm2-17Rt | GCACCGCAAATCCAAAGTTTTTTTTTTT    | 27 |
|                                        | Rm3-19t  | GGGCTTGCTTGGTATCTATTTTTTTTTTT   | 29 |
|                                        | Rm3-19Rt | TAGATACCAAGCAAGCCCTTTTTTTTTTT   | 29 |
|                                        | Rm4-19t  | GATCTGAACTTAGACGGGATTTTTTTTTTT  | 29 |
|                                        | Rm4-t19R | TTTTTTTTTTTCCCGTCTAAGTTCAGATC   | 29 |
| <i>Trichophyton<br/>mentagrophytes</i> | 68A 1    | TTTTTTTTTTTGTTTAGCCACTAAAGAGAG  | 29 |
|                                        | 68A 2    | TTTTTTTTTTTGTTTAGCCACTAAAGAGA   | 28 |
|                                        | 68A 4R   | TTTTTTTTTTTGTTTAGCCACTAAAGAGAGG | 30 |
|                                        | 69A-10   | GCCCCCGTCTTTGGGGGTTTTTTTTTTTT   | 28 |
| <i>Trichophyton</i>                    | 66B 6R   | TTTTTTTTTTTGCTCGAGGCTCCCAGAAGG  | 29 |

|                              |                         |                                 |                          |
|------------------------------|-------------------------|---------------------------------|--------------------------|
| <i>rubrum</i>                | 66B 13R                 | TTTTTTTTTTCTCGAGGCTCCCAGAAGG    | 28                       |
|                              | 66B 14R                 | TTTTTTTTTTGCTCGAGGCTCCCAGAAG    | 28                       |
|                              | 67A 1                   | TTTTTTTTTTCAGCCAATCCAGCGCCCTCA  | 30                       |
|                              | 67A 7                   | TTTTTTTTTTCAGCCAATCCAGCGCCCTC   | 29                       |
|                              | 67A 8                   | TTTTTTTTTTAGCCAATCCAGCGCCCTCA   | 29                       |
|                              | 67B 17                  | AGCCAATTCAGCGCCCTTTTTTTTTTT     | 27                       |
|                              | 67B 19                  | CAGCCAATTCAGCGCCCTTTTTTTTTTT    | 29                       |
| <i>Trichophyton</i>          | 47A 6                   | CCTATCCTGGGGGGCCTTTTTTTTTTT     | 26                       |
| <i>tonsurans</i>             | 47A 7                   | TTTTTTTTTTCCTATCCTGGGGGGCC      | 26                       |
|                              | 47A 19R                 | TTTTTTTTTTTATCCTGGGGGGCCGGCCT   | 29                       |
|                              | 47B 1                   | TTTTTTTTTTTGAGCCGCTATAAAGAGAGG  | 29                       |
|                              | 47B 4                   | TTTTTTTTTTTGAGCCGCTATAAAGAGAGGC | 30                       |
|                              | 47B 19R                 | GAGCCGCTATAAAGAGAGGTTTTTTTTTT   | 29                       |
|                              | <i>Trichosporon</i> sp. | 78A-3                           | TTTTTTTTTCTTGCCTCTCTGGTA |
| 78C-1                        |                         | TTTTTTTTTTGCTCGCCTTAAAAGAGTT    | 28                       |
| <i>Trichosporon asahii</i>   | 79A-5                   | TTTTTTTTTTGCGTCTGCGATTCT        | 25                       |
|                              | 79A-6a                  | TTTTTTTTTTGGGCGTCTGCAATTTC      | 26                       |
| <i>Trichosporon cutaneum</i> | 31A-2                   | TTTTTTTTTTCGGTCAATTGATTTTACAAA  | 30                       |
|                              | 31A-4R                  | TTTGTAATAATCAATTGACCGTTTTTTTTTT | 30                       |
|                              | 32A 17                  | TTTTTTTTTTAACTTGTCTTATCTGGC     | 27                       |
