# Supplementary material
Source: PubMed Central journal article supplement (PMC5925724)
Supplement: JCM.01908-17_zjm999095939s2.pdf [file JCM.01908-17_zjm999095939s2.pdf]

Supplemental Table 2 Nucleotides accession numbers of the nucleotides sequences deposited in GenBank file Microarray\_sequences\_2017.sqn: MG599122 - MG599246

|                                      |          |
|--------------------------------------|----------|
| Microarray_sequences_2017.sqn LEM002 | MG599122 |
| Microarray_sequences_2017.sqn LEM003 | MG599123 |
| Microarray_sequences_2017.sqn LEM004 | MG599124 |
| Microarray_sequences_2017.sqn LEM005 | MG599125 |
| Microarray_sequences_2017.sqn LEM006 | MG599126 |
| Microarray_sequences_2017.sqn LEM007 | MG599127 |
| Microarray_sequences_2017.sqn LEM008 | MG599128 |
| Microarray_sequences_2017.sqn LEM009 | MG599129 |
| Microarray_sequences_2017.sqn LEM010 | MG599130 |
| Microarray_sequences_2017.sqn LEM011 | MG599131 |
| Microarray_sequences_2017.sqn LEM012 | MG599132 |
| Microarray_sequences_2017.sqn LEM013 | MG599133 |
| Microarray_sequences_2017.sqn LEM014 | MG599134 |
| Microarray_sequences_2017.sqn LEM015 | MG599135 |
| Microarray_sequences_2017.sqn LEM016 | MG599136 |
| Microarray_sequences_2017.sqn LEM017 | MG599137 |
| Microarray_sequences_2017.sqn LEM018 | MG599138 |
| Microarray_sequences_2017.sqn LEM019 | MG599139 |
| Microarray_sequences_2017.sqn LEM020 | MG599140 |
| Microarray_sequences_2017.sqn LEM021 | MG599141 |
| Microarray_sequences_2017.sqn LEM022 | MG599142 |
| Microarray_sequences_2017.sqn LEM023 | MG599143 |
| Microarray_sequences_2017.sqn LEM024 | MG599144 |
| Microarray_sequences_2017.sqn LEM025 | MG599145 |
| Microarray_sequences_2017.sqn LEM026 | MG599146 |
| Microarray_sequences_2017.sqn LEM027 | MG599147 |
| Microarray_sequences_2017.sqn LEM028 | MG599148 |
| Microarray_sequences_2017.sqn LEM029 | MG599149 |
| Microarray_sequences_2017.sqn LEM030 | MG599150 |
| Microarray_sequences_2017.sqn LEM031 | MG599151 |

|                                      |          |
|--------------------------------------|----------|
| Microarray_sequences_2017.sqn LEM032 | MG599152 |
| Microarray_sequences_2017.sqn LEM033 | MG599153 |
| Microarray_sequences_2017.sqn LEM034 | MG599154 |
| Microarray_sequences_2017.sqn LEM036 | MG599155 |
| Microarray_sequences_2017.sqn LEM037 | MG599156 |
| Microarray_sequences_2017.sqn LEM038 | MG599157 |
| Microarray_sequences_2017.sqn LEM039 | MG599158 |
| Microarray_sequences_2017.sqn LEM040 | MG599159 |
| Microarray_sequences_2017.sqn LEM042 | MG599160 |
| Microarray_sequences_2017.sqn LEM043 | MG599161 |
| Microarray_sequences_2017.sqn LEM044 | MG599162 |
| Microarray_sequences_2017.sqn LEM045 | MG599163 |
| Microarray_sequences_2017.sqn LEM046 | MG599164 |
| Microarray_sequences_2017.sqn LEM047 | MG599165 |
| Microarray_sequences_2017.sqn LEM049 | MG599166 |
| Microarray_sequences_2017.sqn LEM050 | MG599167 |
| Microarray_sequences_2017.sqn LEM051 | MG599168 |
| Microarray_sequences_2017.sqn LEM052 | MG599169 |
| Microarray_sequences_2017.sqn LEM053 | MG599170 |
| Microarray_sequences_2017.sqn LEM054 | MG599171 |
| Microarray_sequences_2017.sqn LEM055 | MG599172 |
| Microarray_sequences_2017.sqn LEM056 | MG599173 |
| Microarray_sequences_2017.sqn LEM057 | MG599174 |
| Microarray_sequences_2017.sqn LEM058 | MG599175 |
| Microarray_sequences_2017.sqn LEM064 | MG599176 |
| Microarray_sequences_2017.sqn LEM065 | MG599177 |
| Microarray_sequences_2017.sqn LEM066 | MG599178 |
| Microarray_sequences_2017.sqn LEM067 | MG599179 |
| Microarray_sequences_2017.sqn LEM068 | MG599180 |
| Microarray_sequences_2017.sqn LEM069 | MG599181 |
| Microarray_sequences_2017.sqn LEM070 | MG599182 |
| Microarray_sequences_2017.sqn LEM071 | MG599183 |

|                                      |          |
|--------------------------------------|----------|
| Microarray_sequences_2017.sqn LEM072 | MG599184 |
| Microarray_sequences_2017.sqn LEM073 | MG599185 |
| Microarray_sequences_2017.sqn LEM075 | MG599186 |
| Microarray_sequences_2017.sqn LEM076 | MG599187 |
| Microarray_sequences_2017.sqn LEM078 | MG599188 |
| Microarray_sequences_2017.sqn LEM079 | MG599189 |
| Microarray_sequences_2017.sqn LEM080 | MG599190 |
| Microarray_sequences_2017.sqn LEM081 | MG599191 |
| Microarray_sequences_2017.sqn LEM082 | MG599192 |
| Microarray_sequences_2017.sqn LEM083 | MG599193 |
| Microarray_sequences_2017.sqn LEM084 | MG599194 |
| Microarray_sequences_2017.sqn LEM085 | MG599195 |
| Microarray_sequences_2017.sqn LEM086 | MG599196 |
| Microarray_sequences_2017.sqn LEM087 | MG599197 |
| Microarray_sequences_2017.sqn LEM088 | MG599198 |
| Microarray_sequences_2017.sqn LEM089 | MG599199 |
| Microarray_sequences_2017.sqn LEM090 | MG599200 |
| Microarray_sequences_2017.sqn LEM091 | MG599201 |
| Microarray_sequences_2017.sqn LEM092 | MG599202 |
| Microarray_sequences_2017.sqn LEM093 | MG599203 |
| Microarray_sequences_2017.sqn LEM094 | MG599204 |
| Microarray_sequences_2017.sqn LEM095 | MG599205 |
| Microarray_sequences_2017.sqn LEM096 | MG599206 |
| Microarray_sequences_2017.sqn LEM097 | MG599207 |
| Microarray_sequences_2017.sqn LEM098 | MG599208 |
| Microarray_sequences_2017.sqn LEM099 | MG599209 |
| Microarray_sequences_2017.sqn LEM100 | MG599210 |
| Microarray_sequences_2017.sqn LEM101 | MG599211 |
| Microarray_sequences_2017.sqn LEM102 | MG599212 |
| Microarray_sequences_2017.sqn LEM103 | MG599213 |
| Microarray_sequences_2017.sqn LEM104 | MG599214 |
| Microarray_sequences_2017.sqn LEM105 | MG599215 |

|                                      |          |
|--------------------------------------|----------|
| Microarray_sequences_2017.sqn LEM106 | MG599216 |
| Microarray_sequences_2017.sqn LEM107 | MG599217 |
| Microarray_sequences_2017.sqn LEM108 | MG599218 |
| Microarray_sequences_2017.sqn LEM109 | MG599219 |
| Microarray_sequences_2017.sqn LEM110 | MG599220 |
| Microarray_sequences_2017.sqn LEM112 | MG599221 |
| Microarray_sequences_2017.sqn LEM113 | MG599222 |
| Microarray_sequences_2017.sqn LEM114 | MG599223 |
| Microarray_sequences_2017.sqn LEM115 | MG599224 |
| Microarray_sequences_2017.sqn LEM116 | MG599225 |
| Microarray_sequences_2017.sqn LEM117 | MG599226 |
| Microarray_sequences_2017.sqn LEM118 | MG599227 |
| Microarray_sequences_2017.sqn LEM119 | MG599228 |
| Microarray_sequences_2017.sqn LEM120 | MG599229 |
| Microarray_sequences_2017.sqn LEM121 | MG599230 |
| Microarray_sequences_2017.sqn LEM122 | MG599231 |
| Microarray_sequences_2017.sqn LEM123 | MG599232 |
| Microarray_sequences_2017.sqn LEM124 | MG599233 |
| Microarray_sequences_2017.sqn LEM125 | MG599234 |
| Microarray_sequences_2017.sqn LEM126 | MG599235 |
| Microarray_sequences_2017.sqn LEM127 | MG599236 |
| Microarray_sequences_2017.sqn LEM128 | MG599237 |
| Microarray_sequences_2017.sqn LEM129 | MG599238 |
| Microarray_sequences_2017.sqn LEM130 | MG599239 |
| Microarray_sequences_2017.sqn LEM131 | MG599240 |
| Microarray_sequences_2017.sqn LEM132 | MG599241 |
| Microarray_sequences_2017.sqn LEM133 | MG599242 |
| Microarray_sequences_2017.sqn LEM134 | MG599243 |
| Microarray_sequences_2017.sqn LEM135 | MG599244 |
| Microarray_sequences_2017.sqn LEM136 | MG599245 |
| Microarray_sequences_2017.sqn LEM137 | MG599246 |
